1 **Genetic drift versus climate spreading dynamics of COVID-19**

2

3 R. Di Pietro <sup>1</sup>, M. Basile <sup>1</sup>, L. Antolini <sup>2</sup> and S. Alberti <sup>3\*</sup>

4

5 <sup>1</sup> Department of Medicine and Aging Sciences, Section of Biomorphology, G. d'Annunzio  
6 University of Chieti-Pescara, Italy.

7 <sup>2</sup> Center for Biostatistics, Department of Clinical Medicine, Prevention and Biotechnology,  
8 University of Milano-Bicocca, Monza, Italy.

9 <sup>3</sup> Unit of Medical Genetics, Department of Biomedical Sciences - BIOMORF, University of  
10 Messina, via Consolare Valeria, Messina, Italy.

11

12 \* Address reprint requests to Prof. Alberti at the Unit of Medical Genetics, Department of  
13 Biomedical Sciences - BIOMORF, University of Messina, via Consolare Valeria, Messina, Italy, or  
14 at [salberti@unime.it](mailto:salberti@unime.it)

15

16 Drs. Di Pietro and Basile contributed equally to this article.

17

18

19 **Running title:** COVID-19 diffusion rate determinants

20

21 **Word count of the abstract:** 236

22

23 **Word count of the text:**

24 **Abstract**

25 **Background**

26 Current propagation models of COVID-19 pandemic spreading appear poorly consistent with  
27 existing epidemiological data and with evidence that SARS-CoV-2 is rapidly mutating, with  
28 potential aggressive evolution of the disease.

29 **Methods**

30 We challenged environmental versus genetic evolution models of COVID-19 spreading, over  
31 168,089 laboratory-confirmed infection cases in Italy, Spain and Scandinavia. Landmark dates were  
32 set for each of the countries analyzed at peak diffusion rates this date, and the doubling time versus  
33 cumulative number of diagnoses was computed. Diffusion data in Germany, France and UK  
34 provided a validation dataset on 210,239 additional cases. Mutations and mutation rates of SARS-  
35 CoV-2 versus COVID-19 spreading were analyzed at [nextstrain.org/ncov/europe](https://nextstrain.org/ncov/europe).

36 **Results**

37 The mean doubling time of COVID-19 was 6.63 days in northern Italy, 5.87 days in central areas,  
38 and 5.38 days in southern Italy, for shorter COVID-19 doubling time in warmer regions. Spain  
39 extended this trend, with a mean COVID-19 doubling time of 4.2 days. Slower diffusion across  
40 progressively colder regions was observed in Scandinavia, with 9.4 days COVID-19 doubling time  
41 in Sweden, 10.8 days in Finland and 12.95 days in Norway. This model was supported by the  
42 structure of SARS-CoV-2 mutation strings upon sequential diffusion across distinct geographic  
43 areas.

44 **Conclusions**

45 Our findings indicate COVID-19 association to a sharp North/South climate gradient, with faster  
46 spreading in southern regions. Thus, warmer climate conditions may not limit SARS-CoV-2  
47 diffusion. Very cold regions may be better spared by recurrent courses of SARS-CoV-2 infection.

48

49

50 **Keywords:** COVID-19, pandemic, spreading dynamics, climate areas, mutation rates.

## 51 **Introduction**

52 A first study in China on 425 cases identified initial transmission dynamics of Severe Acute  
53 Respiratory Syndrome (SARS) in 2019 (COVID-19) (1). In its early stages, the epidemic doubled  
54 in size every 6.4 (2) to 7.4 (1) days, with a reproductive number ( $R_0$ ) of infectious cases from 2.2  
55 (1) to 2.7 (2). Later studies described how the disease spread to Singapore (3), then to Germany (4),  
56 France and Finland ([www.ecdc.europa.eu/en/covid-19-pandemic](http://www.ecdc.europa.eu/en/covid-19-pandemic)) (5-7).

57 However, key epidemiological evidence remained to be acquired (7). Major uncertainties  
58 remained on COVID-19 spreading determinants. SARS-CoV-2 was proposed to be sensitive to  
59 temperature and humidity, which may affect diffusion across diverse climate areas (8)  
60 ([papers.ssrn.com/sol3/papers.cfm?abstract\\_id=3550308](http://papers.ssrn.com/sol3/papers.cfm?abstract_id=3550308);  
[ssrn.com/abstract=3556998](http://ssrn.com/abstract=3556998);  
61 [www.medrxiv.org/content/10.1101/2020.02.22.20025791v1](http://www.medrxiv.org/content/10.1101/2020.02.22.20025791v1)). Diversity among substrains of SARS-  
62 CoV-2 occurs across different regions in the world ([nextstrain.org/ncov/global](http://nextstrain.org/ncov/global)). SARS-CoV-2  
63 possesses a single-strand RNA genome (9) and was soon found to acquire genomic mutations.  
64 Selective pressure may apply to SARS-CoV-2 genomic drifting, and this may intertwine with  
65 geographic diffusion variables.

66 Current propagation models predicted a limited impact of COVID-19 in the Southern  
67 hemisphere during seasons that were infection-prone in the Northern hemisphere  
68 ([papers.ssrn.com/sol3/papers.cfm?abstract\\_id=3550308](http://papers.ssrn.com/sol3/papers.cfm?abstract_id=3550308); [ssrn.com/abstract=3556998](http://ssrn.com/abstract=3556998)). However,  
69 early foci of infection were detected in Australia and New Zealand (Figure 1). Outbreaks were also  
70 revealed in South America and extended to Central America and Mexico. Further infection foci  
71 were revealed in Saudi Arabia and Africa, and extended to sub-Saharan countries (Tables S1, S2),  
72 questioning simple models of climate-dependent COVID-19 spreading.

73 Coronaviruses spread to some extent similarly to the influenza virus (8), through small  
74 droplets suspended in the air, suggesting sensitivity to environmental humidity and temperature  
75 conditions. A recent meta-analysis (10), though, indicated resilience of coronaviruses to the  
76 environment. In a comparison to SARS-CoV-1, SARS-CoV-2 remained viable in aerosols for  
77 hours, and persisted over solid surfaces, 72 hours on plastic, 48 hours on stainless steel and 24  
78 hours on cardboard (11) suggesting the need to revise current SARS-CoV-2 diffusion models.

79 This led us to challenge a genetic versus climate-driven additive coronavirus infection  
80 model. A robust analysis of SARS-CoV-2 spreading determinants required high-information  
81 density (12, 13). Case incidence models depend on complex factors interplay (global traveling,  
82 founder effect versus time from initial infection (2), population clustering in big cities, social  
83 dynamics, governmental policies, infectious ability of the virus (14, 15), COVID-19 containment  
84 procedures). Among them, a major confounding factor is the time of initial infection at any given

85 place, which, everything else being equal, leads to vastly different absolute numbers of derived  
86 cases (2). Velocity of infection spreading was shown to be a hard composite index of the  $R_0$  of the  
87 virus and of patients viral load/disease stage/severity (1, 16).

88 Vastly diverse climatic regions around the CET longitude (15°E), were severely exposed to  
89 infection. Spain and Italy were the countries with the highest initial incidence of COVID-19 in  
90 Europe (Figures 1, S1, Table S3). The heaviest initial casualties in Italy were suffered by Lombardy  
91 and Veneto, i.e. cold and humid areas during wintertime. Markedly warmer and drier climate  
92 conditions prevail in southern regions of the country. A further shift toward warmer/drier conditions  
93 occurs in Spain. Scandinavian countries appeared initially spared by the infection (Table S4) and  
94 provided a reference for cold winter temperatures, over a Sweden-Finland-Norway axis. Thus, we  
95 assessed a climate-dependent coronavirus infection model, through the analysis of 86,498 infection  
96 cases in Italy, 64,095 in Spain, as compared to 17,496 cases in Scandinavia ([github.com/pcm-](https://github.com/pcm-dpc/COVID-19)  
97 [dpc/COVID-19](https://github.com/pcm-dpc/COVID-19)) (Supplemental Appendix). Diffusion data in France (Table S5), Germany (Table  
98 S6), and UK (Table S7) constituted a validation dataset of 210,239 infection cases. This model was  
99 then merged with the coronavirus genetic drift-driven diffusion determinants, according to mutation  
100 trajectories in the analyzed areas.

101

## 102 **Methods**

### 103 **Incidence data**

104 Laboratory-confirmed infection cases in Europe cases were retrieved at peak diffusion rates as  
105 follows: Italy ([github.com/pcm-dpc/COVID-19](https://github.com/pcm-dpc/COVID-19), March 27<sup>th</sup> 2020), France  
106 ([dashboard.covid19.data.gouv.fr/vue-d-ensemble?locatio\\_n=FRA](https://dashboard.covid19.data.gouv.fr/vue-d-ensemble?locatio_n=FRA); April 4<sup>th</sup> 2020), UK  
107 ([www.nhs.uk/](http://www.nhs.uk/); April 9<sup>th</sup> 2020), Germany ([corona.rki.de](https://corona.rki.de); April 2<sup>nd</sup> 2020), Spain (RTVE - Ministry  
108 of Health; [www.rtve.es/noticias/20200415/mapa-del-coronavirus-espana/2004681.shtml](https://www.rtve.es/noticias/20200415/mapa-del-coronavirus-espana/2004681.shtml); March  
109 31<sup>st</sup> 2020), Sweden (Public Health Agency of Sweden; [www.folkhalsomyndigheten.se/smittskydd-](https://www.folkhalsomyndigheten.se/smittskydd-beredskap/utbrott/aktuella-utbrott/covid-19)  
110 [beredskap/utbrott/aktuella-utbrott/covid-19](https://www.folkhalsomyndigheten.se/smittskydd-beredskap/utbrott/aktuella-utbrott/covid-19); April 13<sup>th</sup> 2020), Finland (National Institute for Health  
111 and Welfare THL; [thl.fi/en/web/thlfi-en](https://thl.fi/en/web/thlfi-en); April 7<sup>th</sup> 2020), Norway; data from the Norwegian  
112 Institute of Public Health; [www.fhi.no/sv/smittsomme-sykdommer/corona/dags--og-](https://www.fhi.no/sv/smittsomme-sykdommer/corona/dags--og-ukerapporter/dags--og-ukerapporter-om-koronavirus)  
113 [ukerapporter/dags--og-ukerapporter-om-koronavirus](https://www.fhi.no/sv/smittsomme-sykdommer/corona/dags--og-ukerapporter/dags--og-ukerapporter-om-koronavirus); April 7<sup>th</sup> 2020).

114 Incidence data were collapsed into a global database, to explore case incidence over time,  
115 and health outcome measures across countries and country provinces. Disease severity was  
116 classified as (a) hospitalized cases, (b) intensive-care unit patients, (c) recovered cases, (d) deaths.  
117 Incidence scatter plots by region were linked to Köppen–Geiger climate classification maps  
118 ([koeppen-geiger.vu-wien.ac.at/present.htm](https://koeppen-geiger.vu-wien.ac.at/present.htm)). These were computed as mean parametrization of

119 1980-2016 data (17). The three-variable classification by country areas was quantified as a string  
120 and utilized as an independent variable versus COVID-19 spreading velocity ([Table 1](#)).

121

## 122 **SARS-CoV-2 mutation analysis**

123 SARS-CoV-2 genomic RNA sequences and country-correlated data were obtained from  
124 [nextstrain.org/ncov/global](https://nextstrain.org/ncov/global). Scatter plots were generated, by strings of acquired mutations over time  
125 and overall number of mutations per genome per chosen area. Phylogeny trees for compiled  
126 mutations strings were then obtained according to mutant branch descriptors  
127 ([nextstrain.org/ncov/europe?branchLabel=aa](https://nextstrain.org/ncov/europe?branchLabel=aa)) ([Figures S2-9](#)).

128

## 129 **Statistical analysis**

130 The cumulative incidence of COVID-19 diagnoses was contrasted to calendar time for each  
131 province in a scatter plot (12, 13). These plots acted as a smoother, for determining the trajectory of  
132 infection cases. A landmark date for total numbers of diagnoses was set according to case incidence  
133 shape in each dataset. From this date, the doubling time for cumulative number of diagnoses was  
134 calculated backward for each province as follows. Two dates were identified: the maximum date, at  
135 which the cumulative number of diagnoses were lower than a half of the cumulative number of  
136 diagnoses at the landmark time, and the minimum date, with a cumulative number of diagnoses  
137 greater than a half of the cumulative number of diagnoses at the landmark date. The fraction of days  
138 from the minimum date to achieve half of the cumulative number of diagnoses at the landmark date  
139 were obtained by a linear assumption for the cumulative incidence between the two dates.  
140 Comparison of doubling time values was conducted versus central intercepts. Coefficients, standard  
141 error, 95% confidence intervals were computed. Percentile distribution boxplots of COVID-19  
142 doubling times were drawn. Median, maximum value, minimum value and distribution outliers  
143 were computed. The correlation of discrete values of COVID-19 spreading rates curve versus  
144 climate-area string values was computed by Anova.

145

## 146 **Software**

147 Stata software version 16 was used for data importing, manipulation and graphics (StataCorp.  
148 2019. *Stata Statistical Software: Release 16*. College Station, TX: StataCorp LLC).

149

## 150 **Results**

151 Our attention was first drawn to the Southern hemisphere. Simple propagation models predicted  
152 essential absence of COVID-19 diffusion, during seasons that were infection-prone in the Northern

153 hemisphere. However, early foci of infection were detected in Australia and New Zealand ([Figure](#)  
154 [1A](#)). South and Central America appeared initially spared. Assessment at later time points indicated,  
155 though, large-scale ( $\geq 30$  infection cases) outbreaks in Argentina, Bolivia, Brazil, Chile, Colombia,  
156 Ecuador, Perù, Uruguay, Venezuela. Parallel outbreaks were revealed in Costa Rica, Dominican  
157 Republic, Panama and Mexico ([Figure 1C](#), [Table S1](#)).

158 Africa, Middle-East and the Arabian peninsula also appeared spared during the initial course  
159 of COVID-19 ([Figure 1A](#)). However, infection foci appeared soon in Saudi Arabia, a non-high-risk  
160 country by most standards. This was soon recognized as a risk for COVID-19 spreading (18), and  
161 Saudi Arabia suspended the Umrah pilgrimage to Mecca and Medina on March 4th. Additional  
162 cases were reported in United Arab Emirates, Bahrain, Kuwait, Oman. Infectious foci were revealed  
163 in other countries facing the Persian Gulf and the Gulf of Oman, such as Iraq, Iran, Afghanistan,  
164 Pakistan. Further outbreaks were recorded in continental Africa, i.e. in Algeria, Egypt, Burkina  
165 Faso, Senegal, Democratic Republic of the Congo, Cameroon, Côte d'Ivoire, Ghana, Nigeria,  
166 South Africa ([Table S2](#)).

167

#### 168 **COVID-19 doubling time by geographic area**

169 Global data were collected from country registries and infection rates over time were computed for:  
170 Italy: on infection cases from March 3<sup>rd</sup> to March 27<sup>th</sup> (n=86,498) ([Supplemental Appendix](#))  
171 ([Figures S10-12](#)).

172 Spain: on infection cases from February 25<sup>th</sup> to March 27<sup>th</sup> 2020 (n=64,095) ([Figure S13](#)).

173 Norway: data (>50 infection case outbreaks) were obtained from February 21<sup>st</sup> to April 14<sup>th</sup> 2020  
174 (n=6,676) ([Figure S14](#)).

175 Finland: on infection cases from March 1<sup>st</sup> to April 7<sup>th</sup> 2020 (n=2,646) ([Figure S15](#)).

176 Sweden: data (>50 infection case outbreaks) were obtained from February 26<sup>th</sup> to April 9<sup>th</sup> 2020  
177 (n=8,995) ([Figure S16](#)).

178 France: on infection cases from February 25<sup>th</sup> to April 4<sup>th</sup> 2020 ([Figure S17](#)).

179 UK: on infection cases from February 1<sup>st</sup> to April 9<sup>th</sup> 2020 ([Figure S17](#)).

180 Germany: on infection cases from February 24<sup>th</sup> to April 2<sup>nd</sup> 2020 ([Figure S17](#)).

181 COVID-19 doubling times by Countries, Regions and Provinces were computed as indicated.  
182 Landmark dates were utilized as set for each analyzed geographic area. From this date the time for  
183 doubling the cumulative number of diagnoses was calculated backward for each province as  
184 described.

185

#### 186 **COVID-19 doubling time versus climate region**

187 Quantitative climate assessments are affected by interdependent sets of variables, such as humidity  
188 and temperature, which provide sources of uncertainty in climate models (19). We thus utilized the  
189 Köppen–Geiger climate classification maps ([koeppen-geiger.vu-wien.ac.at/present.htm](http://koeppen-geiger.vu-wien.ac.at/present.htm)), as drawn  
190 over 30+ years of observations. This was distilled as a three-variable classification by country areas,  
191 quantified as a string and utilized as an independent variable versus COVID-19 spreading velocity  
192 (Table 1).

193 Summary doubling times were grouped by geographic region. The average doubling time  
194 for northern Italy was 6.63 (SD=1.94) days; 5.87 (SD=1.08) days in central regions; 5.38 (SD=2.31)  
195 days in southern areas, for significantly shorter doubling time in southern regions (P=0.02) (Table  
196 S3, Figures S10-12). The mean COVID-19 doubling-time for the whole country was 6.06  
197 (SD=1.95) days (Table S3).

198 With a doubling time of 4.2-days, Spain extended such a tendency (Figure S13). At the  
199 opposite end of the climate spectrum, Scandinavia showed longer COVID-19 doubling times, over  
200 a Sweden-Finland-Norway axis, with a doubling time of 9.4 days (SD=1.2) for Sweden (P<0.0001  
201 versus northern Italy), 10.8 days for Finland, 12.95 days (SD=0.52) for Norway (P<0.0001 versus  
202 northern Italy) (Table S3, Figures S14-16). This depicted a distinct North-South gradient of  
203 COVID-19 spreading velocity (Anova P<0.0001) (Table 1).

204 Such climate model was challenged versus COVID-19 diffusion rates in Germany, France  
205 and UK over 210,239 laboratory-confirmed infection cases. Pandemic doubling time was computed  
206 to be 7.0 days in Germany (Figure S17). In sharp consistency, those in France and UK were 7.5 and  
207 7.2 days, respectively. Average climate areas for all three countries were Cfb Köppen–Geiger  
208 climate classification classes (Table 1), which bridged classification classes of Northern Italy and  
209 Southern Sweden. Validation dataset COVID-19 doubling times were thus computed to bridge data  
210 from Northern Italy with those of Sweden, as predicted by the model.

211

## 212 **SARS-CoV-2 genetic-drift driven diffusion**

213 The SARS-CoV-2 genomic RNA was shown to progressively mutate over time  
214 ([nextstrain.org/ncov/europe](http://nextstrain.org/ncov/europe)). To determine whether mutation strings correlated with diffusion at  
215 distinct geographic areas, SARS-CoV-2 genomic RNA sequences from different countries were  
216 obtained at sequential times. Scatter plots were then generated, for strings of acquired mutations  
217 versus overall number of accumulated mutations versus time. Phylogeny trees for compiled  
218 mutations were then obtained, according to mutant clade descriptors  
219 ([nextstrain.org/ncov/europe?branchLabel=aa](http://nextstrain.org/ncov/europe?branchLabel=aa)).

220 Sequence mutation analysis revealed up to seven major branches of linear mutation



221 acquisition, at sites of major diffusion after spreading from China (Figures S2-9). A mutation  
222 string-driven aggressiveness of SARS-CoV-2 spreading, was expected to lead to (a) correlation of  
223 specific strings with highest-hit countries, (b) a late predominance of one/few dominant strings over  
224 the course of COVID-19 and (c) increase in disease severity over time. The highest numbers of  
225 accumulated mutations were revealed in SARS-CoV-2 in Wales and Senegal isolates, which were  
226 identified as late disease correlates. Consistent, the lowest number of accumulated mutations was  
227 recorded in Italy, the country that was first to show strong disease severity in Europe. A large  
228 mutation load was observed in Spain (n=14), the second hardest-hit country in Europe, as close to  
229 that of Sweden (n=13), a country with much more limited COVID-19 diffusion. Large mutation  
230 loads in late-disease-insurgence countries, such as France and Belgium (n=16), supporting a  
231 relationship with duration of disease course. Four major mutation strings branches were revealed in  
232 all examined European countries, indicating relationship with specific substrains of SARS-CoV-2.

233

## 234 **Discussion**

235 Rapid COVID-19 diffusion in Southern hemisphere countries, Australia, New Zealand, South and  
236 Central America, together with early infection outbreaks in Africa, Middle-East and in the Arabian  
237 peninsula questioned influenza-like propagation models of SARS-CoV-2.

238 More recent, potent models were constructed that better took the complexity of COVID-19  
239 diffusion into account (19, 20). However, actual data on COVID-19 infection dynamics remained  
240 missing (7). We provide the required data for reshaping current models of spreading dynamics of  
241 COVID-19. We analyzed over 378,328 laboratory-confirmed infection cases in continental Europe  
242 and UK. This analysis was complemented by data on mutation-string-driven SARS-CoV-2  
243 spreading at distinct geographic areas.

244 Four major mutation strings branches were revealed in all examined European countries,  
245 indicating relationship with specific substrains of SARS-CoV-2. The highest numbers of  
246 accumulated mutations were revealed in SARS-CoV-2 in Wales and Senegal isolates, which were  
247 identified as late disease correlates. The lowest number of accumulated mutations was recorded in  
248 Italy, the country that was first to show severe disease outbreaks in Europe. A large mutation load  
249 was observed in Spain, which followed as second hardest-hit country in Europe, as close to that of  
250 Sweden, a country with late COVID-19 diffusion. The largest mutational loads were revealed in  
251 France and Belgium, as late-disease-insurgence countries, further supporting a relationship with  
252 duration of disease course.

253 Taken together, our findings indicated that COVID-19 spreading velocity followed a North-  
254 South gradient in Italy, for significantly shorter doubling times in southern regions. With a doubling



255 time of 4.2-days, Spain extended such a position. At the opposite end of the climate spectrum,  
256 Scandinavia showed longer COVID-19 doubling times, over a Sweden-Finland-Norway axis, for a  
257 sharp, quantitative North-South gradient of COVID-19 spreading velocity. This climate model was  
258 verified in the validation dataset of COVID-19 diffusion in Germany, France and UK over 210,239  
259 laboratory-confirmed infection cases. Pandemic doubling times were sharply consistent in  
260 Germany, France and UK, as were ultimate climate-area Köppen–Geiger fingerprints, coordinately  
261 bridging ordering classes of Northern Italy with Southern Sweden.

262 Findings of more efficient coronavirus spreading in warmer regions are consistent with  
263 indications of resilience of coronaviruses to environmental conditions (10) and long-term viability  
264 of SARS-CoV-2 over solid surfaces (11). Of note, the Middle East Respiratory Syndrome  
265 (MERS) was first reported in Saudi Arabia ([www.cdc.gov/coronavirus/mers](http://www.cdc.gov/coronavirus/mers)). MERS is caused  
266 by the MERS-CoV, which is structurally and genetically related to SARS-CoV. MERS is endemic  
267 in the Arabic Peninsula, indicating that at least specific coronavirus strains are resilient to desert  
268 climate conditions ([www.cdc.gov/coronavirus/mers/risk.html](http://www.cdc.gov/coronavirus/mers/risk.html)).

269 Taken together, our findings suggest resilience of SARS-CoV-2 in warmer regions, and  
270 caution that high environmental temperatures may not efficiently tame SARS-CoV-2 infectiousness  
271 (20). On the other hand, we notice that very cold regions may be better spared by recurrent courses  
272 of COVID-19.

273

#### 274 **Acknowledgments**

275 We are much indebted to all the information curators we cite, and to the website providers the  
276 article data and graphic primers have been downloaded from.

277

#### 278 **Role in the article**

279 All authors contributed to literature search, figures, study design, data collection, data analysis, data  
280 interpretation. S.A and R.DiP. wrote the manuscript draft. All authors contributed to discussing and  
281 writing the final text. R.DiP. and M.B. contributed equally to this work.

282

283 **Footnote page**

284 Conflict of interest

285 The authors do not have a commercial or other association that might pose a conflict of interest.

286

287 Funding

288 The University of Messina and Oncoxx Biotech srl provided funding to this work.

289

290 Meeting presentation

291 These findings have not yet been presented to meetings.

292

293 Corresponding author contact information

294 Prof. Saverio Alberti, Head, Medical Genetics, Department of Biomedical Sciences, University of

295 Messina, via Consolare Valeria, 98100 Messina, Italy, Phone: (+39) 090-221.3375, E-mail:

296 salberti@unime.it

## 297 References

- 298 1. Li Q, Guan X, Wu P, Wang X, Zhou L, Tong Y, Ren R, Leung KSM, Lau EHY, Wong JY, Xing  
299 X, Xiang N, Wu Y, Li C, Chen Q, Li D, Liu T, Zhao J, Liu M, Tu W, Chen C, Jin L, Yang R,  
300 Wang Q, Zhou S, Wang R, Liu H, Luo Y, Liu Y, Shao G, Li H, Tao Z, Yang Y, Deng Z, Liu B,  
301 Ma Z, Zhang Y, Shi G, Lam TTY, Wu JT, Gao GF, Cowling BJ, Yang B, Leung GM, Feng Z.  
302 2020. Early Transmission Dynamics in Wuhan, China, of Novel Coronavirus-Infected  
303 Pneumonia. *New England Journal of Medicine* 382:1199-1207.
- 304 2. Wu JT, Leung K, Leung GM. 2020. Nowcasting and forecasting the potential domestic  
305 and international spread of the 2019-nCoV outbreak originating in Wuhan, China: a  
306 modelling study. *The Lancet* 395:689-697.
- 307 3. Pung R, Chiew CJ, Young BE, Chin S, Chen MIC, Clapham HE, Cook AR, Maurer-Stroh S,  
308 Toh MPHS, Poh C, Low M, Lum J, Koh VTJ, Mak TM, Cui L, Lin RVTP, Heng D, Leo Y-S,  
309 Lye DC, Lee VJM, Kam K-q, Kalimuddin S, Tan SY, Loh J, Thoon KC, Vasoo S, Khong WX,  
310 Suhaimi N-A, Chan SJH, Zhang E, Oh O, Ty A, Tow C, Chua YX, Chaw WL, Ng Y, Abdul-  
311 Rahman F, Sahib S, Zhao Z, Tang C, Low C, Goh EH, Lim G, Hou Ya, Roshan I, Tan J, Foo  
312 K, Nandar K, Kurupatham L, Chan PP, et al. 2020. Investigation of three clusters of  
313 COVID-19 in Singapore: implications for surveillance and response measures. *The*  
314 *Lancet* 395:1039-1046.
- 315 4. Hoehl S, Rabenau H, Berger A, Kortenbusch M, Cinatl J, Bojkova D, Behrens P,  
316 Böddinghaus B, Götsch U, Naujoks F, Neumann P, Schork J, Tiarks-Jungk P, Walczok A,  
317 Eickmann M, Vehreschild MJGT, Kann G, Wolf T, Gottschalk R, Ciesek S. 2020. Evidence  
318 of SARS-CoV-2 Infection in Returning Travelers from Wuhan, China. *New England*  
319 *Journal of Medicine* 382:1278-1280.
- 320 5. Sun J, He W-T, Wang L, Lai A, Ji X, Zhai X, Li G, Suchard MA, Tian J, Zhou J, Veit M, Su S.  
321 2020. COVID-19: Epidemiology, Evolution, and Cross-Disciplinary Perspectives. *Trends*  
322 *in Molecular Medicine* doi:<https://doi.org/10.1016/j.molmed.2020.02.008>.
- 323 6. McMichael TM, Currie DW, Clark S, Pogosjans S, Kay M, Schwartz NG, Lewis J, Baer A,  
324 Kawakami V, Lukoff MD, Ferro J, Brostrom-Smith C, Rea TD, Sayre MR, Riedo FX,  
325 Russell D, Hiatt B, Montgomery P, Rao AK, Chow EJ, Tobolowsky F, Hughes MJ,  
326 Bardossy AC, Oakley LP, Jacobs JR, Stone ND, Reddy SC, Jernigan JA, Honein MA, Clark  
327 TA, Duchin JS. 2020. Epidemiology of Covid-19 in a Long-Term Care Facility in King  
328 County, Washington. *New England Journal of Medicine* doi:10.1056/NEJMoa2005412.
- 329 7. Lipsitch M, Swerdlow DL, Finelli L. 2020. Defining the Epidemiology of Covid-19 —  
330 Studies Needed. *New England Journal of Medicine* 382:1194-1196.
- 331 8. Sundell N, Andersson L-M, Brittain-Long R, Lindh M, Westin J. 2016. A four year  
332 seasonal survey of the relationship between outdoor climate and epidemiology of viral  
333 respiratory tract infections in a temperate climate. *Journal of Clinical Virology* 84:59-  
334 63.
- 335 9. Mousavizadeh L, Ghasemi S. 2020. Genotype and phenotype of COVID-19: Their roles  
336 in pathogenesis. *Journal of Microbiology, Immunology and Infection* doi:<https://doi.org/10.1016/j.jmii.2020.03.022>.
- 338 10. Kampf G, Todt D, Pfaender S, Steinmann E. 2020. Persistence of coronaviruses on  
339 inanimate surfaces and their inactivation with biocidal agents. *Journal of Hospital*  
340 *Infection* 104:246-251.
- 341 11. van Doremalen N, Bushmaker T, Morris DH, Holbrook MG, Gamble A, Williamson BN,  
342 Tamin A, Harcourt JL, Thornburg NJ, Gerber SI, Lloyd-Smith JO, de Wit E, Munster VJ.  
343 2020. Aerosol and Surface Stability of SARS-CoV-2 as Compared with SARS-CoV-1. *New*  
344 *England Journal of Medicine* doi:10.1056/NEJMc2004973.

- 345 12. Ambrogi F, Biganzoli E, Querzoli P, Ferretti S, Boracchi P, Alberti S, Marubini E, Nenci I.  
346 2006. Molecular subtyping of breast cancer from traditional tumor marker profiles  
347 using parallel clustering methods. *Clin Cancer Res* 12:781-90.
- 348 13. Cimoli G, Malacarne D, Ponassi R, Valenti M, Alberti S, Parodi S. 2004. Meta-analysis of  
349 the role of p53 status in isogenic systems tested for sensitivity to cytotoxic  
350 antineoplastic drugs. *Biochim Biophys Acta* 1705:103-20.
- 351 14. To KK-W, Tsang OT-Y, Leung W-S, Tam AR, Wu T-C, Lung DC, Yip CC-Y, Cai J-P, Chan  
352 JM-C, Chik TS-H, Lau DP-L, Choi CY-C, Chen L-L, Chan W-M, Chan K-H, Ip JD, Ng AC-K,  
353 Poon RW-S, Luo C-T, Cheng VC-C, Chan JF-W, Hung IF-N, Chen Z, Chen H, Yuen K-Y.  
354 2020. Temporal profiles of viral load in posterior oropharyngeal saliva samples and  
355 serum antibody responses during infection by SARS-CoV-2: an observational cohort  
356 study. *The Lancet Infectious Diseases* doi:[https://doi.org/10.1016/S1473-  
357 3099\(20\)30196-1](https://doi.org/10.1016/S1473-3099(20)30196-1).
- 358 15. Chen Y, Li L. 2020. SARS-CoV-2: virus dynamics and host response. *The Lancet*  
359 *Infectious Diseases* doi:10.1016/S1473-3099(20)30235-8.
- 360 16. Liu Y, Eggo RM, Kucharski AJ. 2020. Secondary attack rate and superspreading events  
361 for SARS-CoV-2. *The Lancet* 395:e47.
- 362 17. Beck HE, Zimmermann NE, McVicar TR, Vergopolan N, Berg A, Wood EF. 2018. Present  
363 and future Köppen-Geiger climate classification maps at 1-km resolution. *Scientific*  
364 *data* 5:180214-180214.
- 365 18. Ebrahim SH, Memish ZA. 2020. COVID-19: preparing for superspreader potential  
366 among Umrah pilgrims to Saudi Arabia. *The Lancet* 395:e48.
- 367 19. Baker RE, Yang W, Vecchi GA, Metcalf CJE, Grenfell BT. 2020. Susceptible supply limits  
368 the role of climate in the early SARS-CoV-2 pandemic. *Science*  
369 doi:10.1126/science.abc2535:eabc2535.
- 370 20. Kissler SM, Tedijanto C, Goldstein E, Grad YH, Lipsitch M. 2020. Projecting the  
371 transmission dynamics of SARS-CoV-2 through the postpandemic period. *Science*  
372 doi:10.1126/science.abb5793:eabb5793.  
373

374 **Figure legends**

375

376 **Figure 1. Worldwide progression of COVID-19.**

377 (A) COVID-19 case incidence, as of 21<sup>st</sup> 2020; numbers are indicated by color code and circle  
378 diameter ([www.healthmap.org/covid-19/](http://www.healthmap.org/covid-19/)).

379 (B) COVID-19 case incidence, as in (A), zoomed over Central Europe.

380 (C) COVID-19 incidence of active cases, as of March 31<sup>st</sup>, 2020; numbers are indicated by circle  
381 diameter (Johns Hopkins University, JHU; [coronavirus.jhu.edu/map.html](https://coronavirus.jhu.edu/map.html)).

382 (D) Coronavirus spreading around the world as of April 4th. Confirmed cases by country since  
383 February 24th (JHU, [public.flourish.studio/visualisation/1694807/](https://public.flourish.studio/visualisation/1694807/)).

384

385 **Figure 2. COVID-19 diffusion and SARS-CoV-2 mutations.**

386 (A) SARS-CoV-2 virus spread according to mutation load.

387 (B) Radial diagram of SARS-CoV-2 mutations worldwide. Concentric circles correspond to the  
388 number of genomic mutations detected in individual virus isolates.

389

390 **Figure 3. COVID-19 diffusion across geographic areas.**

391 (*top*) Distribution boxplots of COVID-19 doubling times. Upper horizontal line: 75<sup>th</sup> percentile;  
392 lower horizontal line: 25<sup>th</sup> percentile; horizontal bar within box: median; upper horizontal bar  
393 outside box: maximum value; lower horizontal bar outside box: minimum value. Dots: distribution  
394 outliers.

395 (*bottom*) doubling time values versus central intercept – Northern Italy. Coef.: coefficient; Std. Err.:  
396 standard error; 95% confidence intervals are shown.  $P > t$ : 0.002 Southern versus Northern Italy;  
397  $< 0.0001$  Sweden versus Northern Italy;  $< 0.0001$  Norway versus Northern Italy.

398

399 **Figure 4. The COVID-19 North-South gradient.**

400 The COVID-19 North-South doubling-time gradient across countries by climate zone is depicted.  
401 The Anova P-value for trend of the curve is shown. Vertical arrows: COVID-19 doubling times in  
402 validation datasets (Germany, France, UK).

403

404 **Table 1: COVID-19 doubling time versus climate area.**

| <b>Country/region</b> | <b>COVID-19 doubling time (days)</b> | <b>Climate area</b> | <b>Lab-confirmed case numbers *</b> |
|-----------------------|--------------------------------------|---------------------|-------------------------------------|
| Spain                 | 4.2                                  | Csa/Csb/Bsk         | 64,095                              |
| Southern Italy        | 5.38                                 | Csa/Csb             | 5,322                               |
| Central Italy         | 5.87                                 | Csa/Cfa/Cfb         | 10,842                              |
| Northern Italy        | 6.63                                 | Cfa/Cfb             | 70,334                              |
| Germany               | 7.0                                  | Cfb                 | 73,522                              |
| France                | 7.5                                  | Cfb                 | 68,665                              |
| UK                    | 7.2                                  | Cfb                 | 68,052                              |
| Sweden                | 9.4                                  | Dfc/Cfb             | 11,321                              |
| Finland               | 10.8                                 | Dfc/Dfb             | 2,646                               |
| Norway                | 12.95                                | Dfc/Dfb/ET          | 5,855                               |

405

406 \*: Laboratory-confirmed infection cases in Europe cases were retrieved by country at peak diffusion rates as follows:  
407 Italy ([github.com/pcm-dpc/COVID-19](https://github.com/pcm-dpc/COVID-19), March 27<sup>th</sup> 2020), France ([dashboard.covid19.data.gouv.fr/vue-d-](https://dashboard.covid19.data.gouv.fr/vue-d-ensemble?location=FRA)  
408 [ensemble?location=FRA](https://dashboard.covid19.data.gouv.fr/vue-d-ensemble?location=FRA); April 4<sup>th</sup> 2020), UK ([www.nhs.uk/](https://www.nhs.uk/); April 9<sup>th</sup> 2020), Germany ([corona.rki.de](https://corona.rki.de); April 2<sup>nd</sup> 2020),  
409 Spain (RTVE - Ministry of Health; [www.rtve.es/noticias/20200415/mapa-del-coronavirus-espana/2004681.shtml](https://www.rtve.es/noticias/20200415/mapa-del-coronavirus-espana/2004681.shtml);  
410 March 31<sup>st</sup> 2020), Sweden (Public Health Agency of Sweden; [www.folkhalsomyndigheten.se/smittskydd-](https://www.folkhalsomyndigheten.se/smittskydd-beredskap/utbrott/aktuella-utbrott/covid-19)  
411 [beredskap/utbrott/aktuella-utbrott/covid-19](https://www.folkhalsomyndigheten.se/smittskydd-beredskap/utbrott/aktuella-utbrott/covid-19); April 13<sup>th</sup> 2020), Finland (National Institute for Health and Welfare THL;  
412 [thl.fi/en/web/thlfi-en](https://thl.fi/en/web/thlfi-en); April 7<sup>th</sup> 2020), Norway; data from the Norwegian Institute of Public Health;  
413 [www.fhi.no/sv/smittsomme-sykdommer/corona/dags--og-ukerapporter/dags--og-ukerapporter-om-koronavirus](https://www.fhi.no/sv/smittsomme-sykdommer/corona/dags--og-ukerapporter/dags--og-ukerapporter-om-koronavirus)).

3/21/2020

Number of cases: 50+ 25-49 10-24 < 10

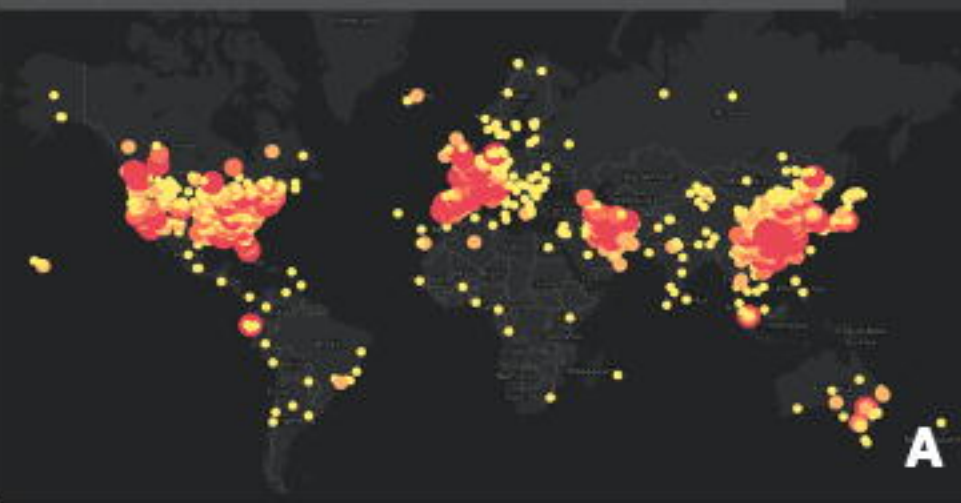

A

3/31/2020

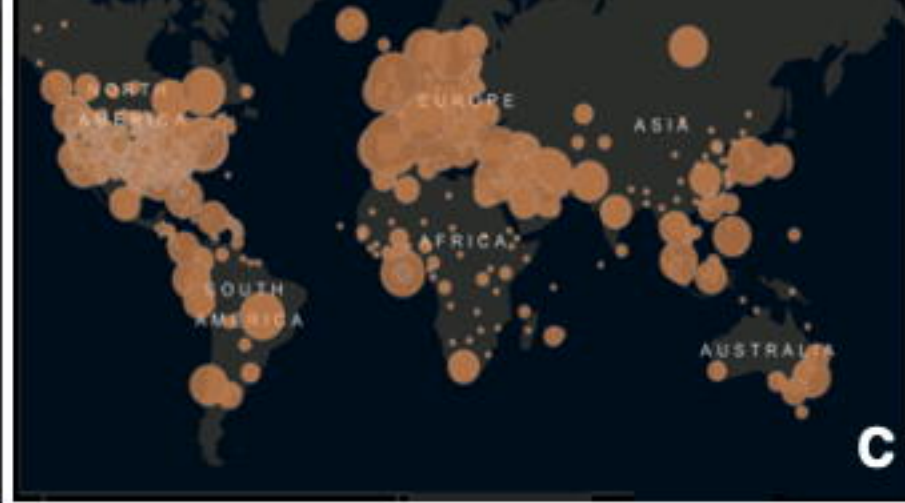

C

3/21/2020

Number of cases: 50+ 25-49 10-24 < 10

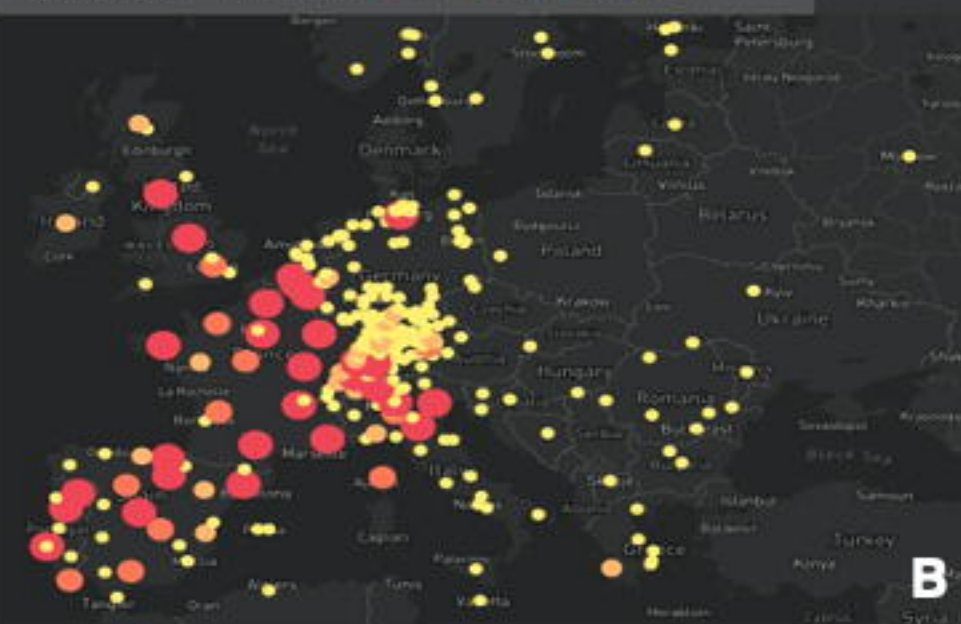

B

### How coronavirus has spread around the world

Confirmed cases by country since Feb. 24

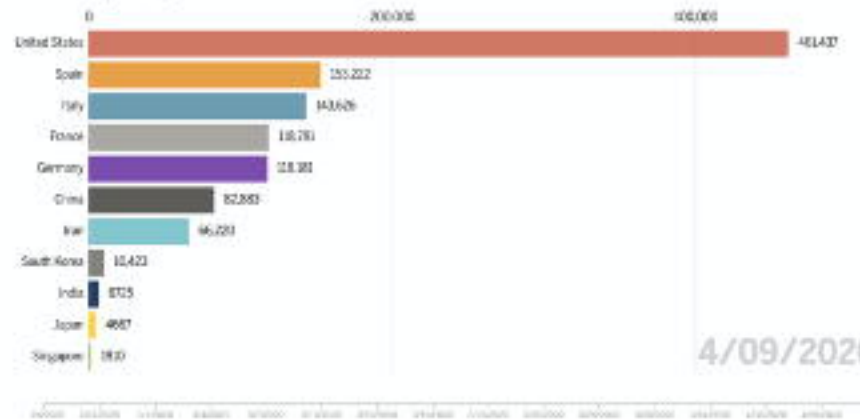

4/09/2020

D



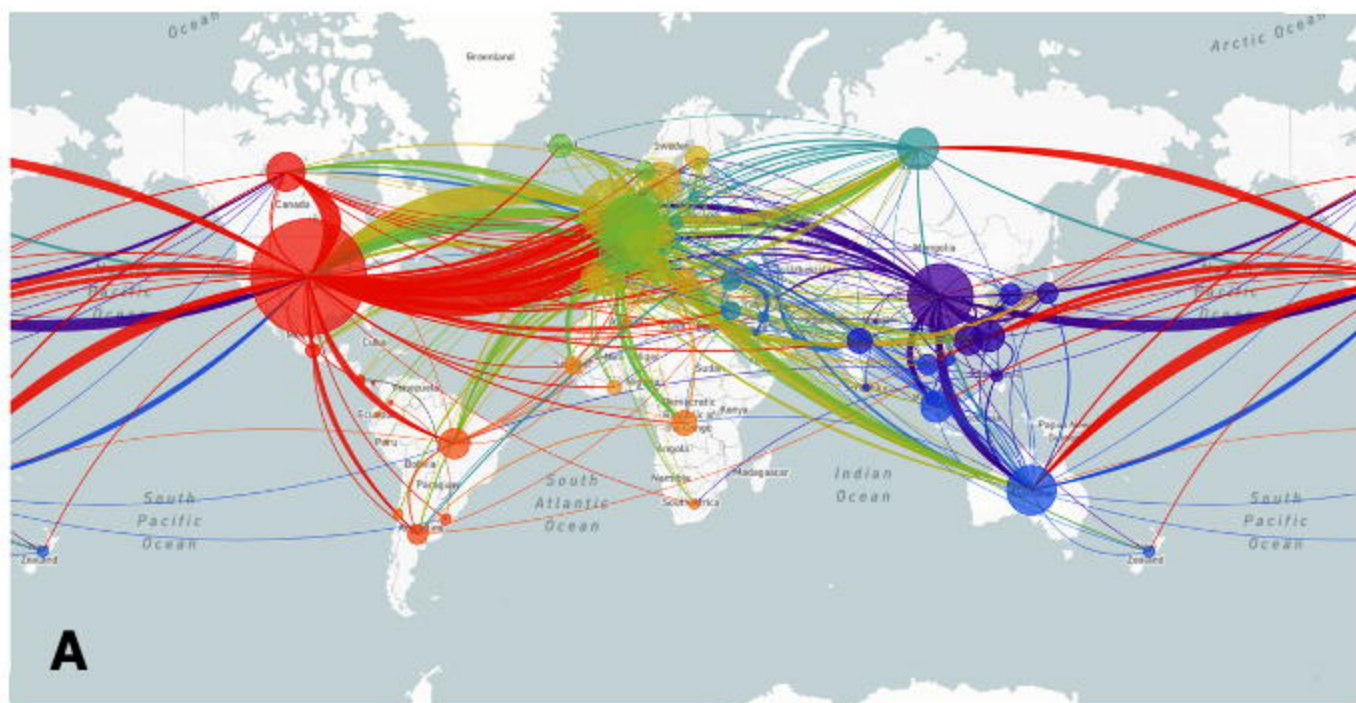

**A**

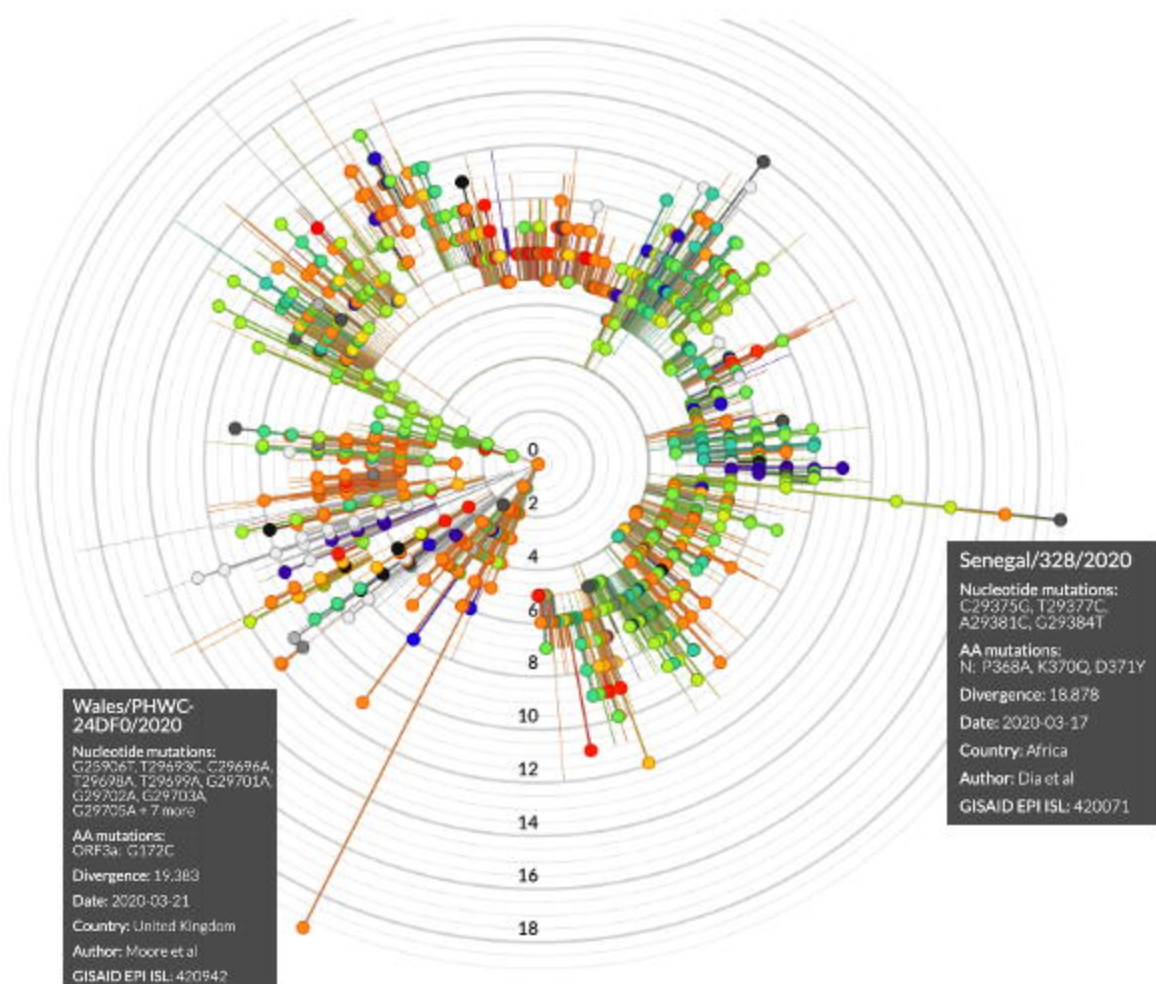

**B**

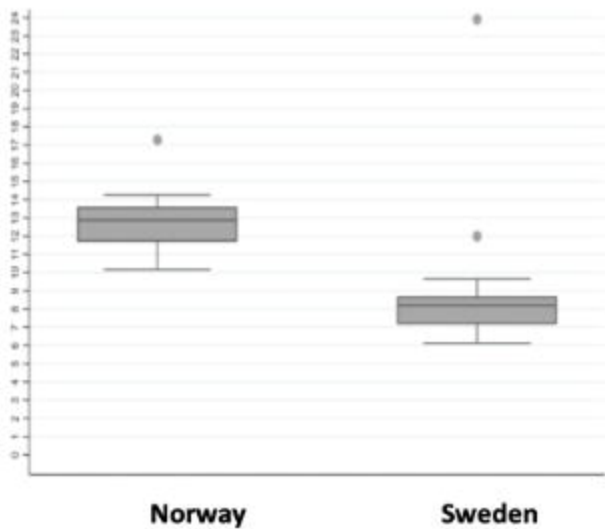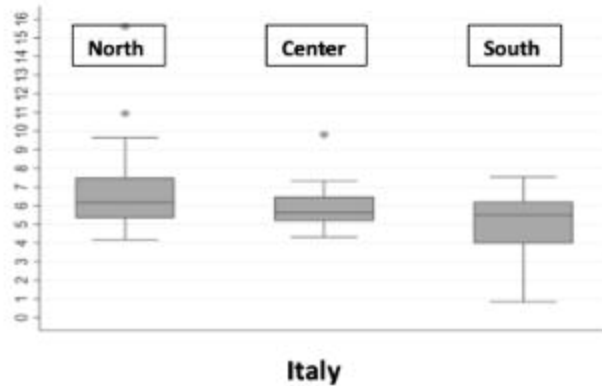

| Region                     | Coef. | Std. Err. | t     | P>t             | [95% Conf. Interval] |
|----------------------------|-------|-----------|-------|-----------------|----------------------|
| intercept Northern Italy   | 6,63  | 0,33      |       |                 | 5,97 7,29            |
| Southern vs Northern Italy | -1,25 | 0,53      | -2,35 | <b>0,02</b>     | -2,31 -0,20          |
| Central vs Northern Italy  | -0,76 | 0,55      | -1,39 | <b>0,166</b>    | -1,84 0,32           |
| Sweden vs Northern Italy   | 2,77  | 0,72      | 3,86  | < <b>0.0001</b> | 1,35 4,19            |
| Norway vs Northern Italy   | 6,32  | 0,77      | 8,25  | < <b>0.0001</b> | 4,80 7,83            |

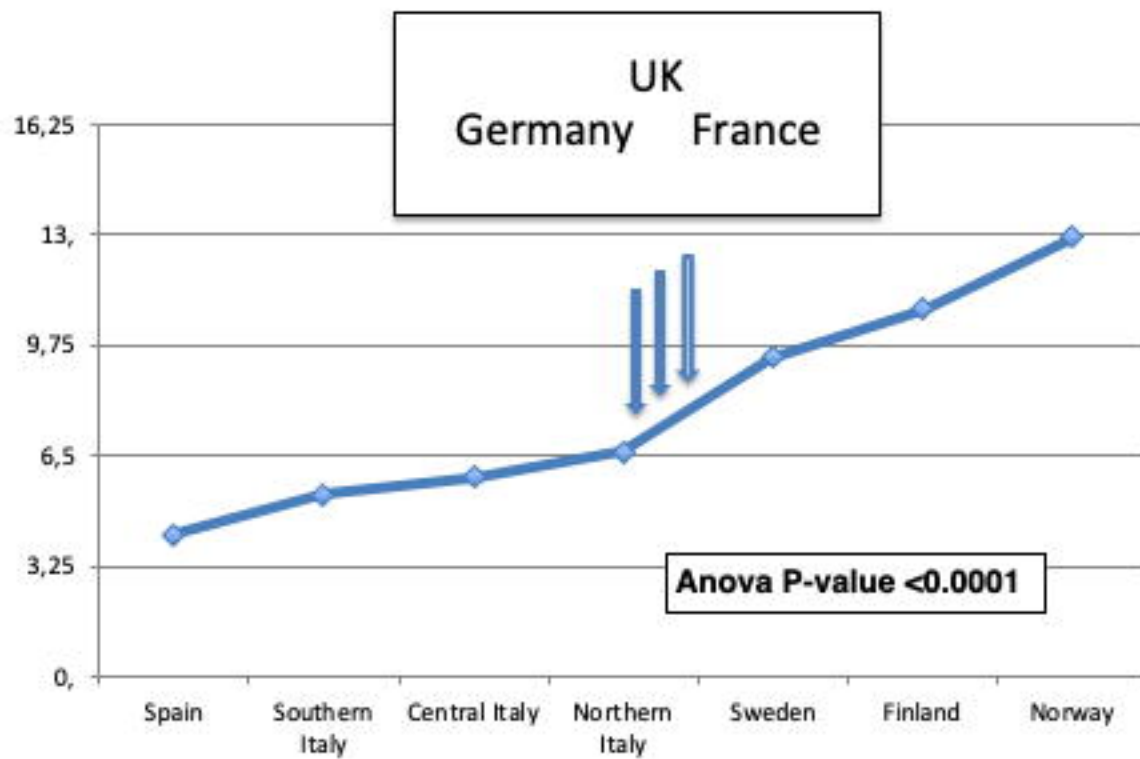

Source: https://medrxiv.org/content/10.1101/2020.05.08.20095448v2.full.pdf
